# Supplementary material
Source: PubMed Central journal article supplement (PMC6708363)
Supplement: pnas.1901888116.sapp.pdf [file pnas.1901888116.sapp.pdf]

1 **Supplementary information:**

2 **Materials and Methods.**

3 Protein expression and purification. KcsA-WT, G77A and G77C cloned in the expression  
4 vector pQE70 were transformed in the *E. coli*-C41 strain (Lucigen) and grown overnight  
5 in Luria-Bertani (LB) supplemented with 1% glucose and 0.4 mg/ml at 37 °C. The  
6 overnight culture was diluted a 100-fold into 1 L of LB media supplemented with 0.2%  
7 glucose, 0.4 mg/ml ampicillin, 0.5 % glycerol and 5 mM MgCl<sub>2</sub> (1) and growth at 37 °C  
8 until it reached an optical density at 600 nm of ~ 0.6. At this point, the cell cultures were  
9 cooled down to 29 °C under continuous agitation for 1 hour. Then, protein expression was  
10 initiated by the addition of 0.1 mM isopropyl thiogalactoside and the media was  
11 supplemented with 10 mM BaCl<sub>2</sub> (a very effective K<sup>+</sup> channel blocker) and 0.4 mg/ml  
12 ampicillin to reinforce the plasmid selection. The cell cultures were incubated at 29 °C  
13 under constant agitation for 24 hours. Next day, the cells expressing KcsA or the mutant  
14 channels were harvested by centrifugation at 4600 rpm at 4 °C. Protein expression levels  
15 were routinely monitored by western blot analysis. The harvested cells were  
16 resuspended in a buffer (Buffer TKS: 50 mM Tris-HCl: 150 mM KCl, pH 8.0)  
17 supplemented with + 170 ug/ml phenylmethylsulfonyl fluoride and treated with 1.0 mg/mL  
18 of egg lysozyme and 5 mM EDTA and rotated at room temperature for 1 h. The cell  
19 suspension then was frozen at -80 °C and next day they were thawed and supplemented  
20 with 5 mM MgCl<sub>2</sub> and 50 ug/ml of DNase for 1 hour. The cell suspension was broken by  
21 passing it through a microfluidizer and then spun down at 100,000 g for 1 h to pellet the  
22 cell membranes. The cell membranes were resuspended with Buffer TKS supplemented  
23 with protease inhibitors, and aliquots were stored at -80 °C until further use. KcsA was  
24 solubilized from the *E. coli* membrane by extracting it with Buffer TKS + 20 mM Dodecyl  
25 Maltoside (DDM) + protease inhibitors for 1 h at room temperature. The solubilized KcsA-  
26 WT or mutant channels was separated from the insoluble material by centrifugation at  
27 100,000 g. Then, the supernatant was applied to a Talon resin column (Clontech), which  
28 was washed with Buffer TKS supplemented with 15 mM imidazole and 2 mM DDM. The  
29 protein was eluted by applying TKS buffer supplemented with 400 mM imidazole and 2  
30 mM DDM. The pure protein was concentrated, incubated with chymotrypsin (1:50) for 2  
31 hours at room temperature and applied to a size-exclusion chromatography column  
32 Enrich SEC 650 10x300 column (Bio-Rad) for final purification and to determine if the  
33 purified channel was properly folded.

34 Macromolecular crystallography: C-terminal truncated KcsA (wilt-type, G77A and G77C)  
35 was mixed with an antibody fragment needed for the crystallization process. The channel-  
36 Fab complex was purified by passing it through a size exclusion chromatography column  
37 ENrich SEC 650 10x300 column (Bio-Rad) pre-loaded with Buffer TKS + 0.5 mM Dodecyl  
38 Maltoside (the G77A or G77C channels did not crystallize in the commonly used decyl  
39 maltoside detergent, instead a systematic search was conducted to determine the optimal  
40 conditions for crystallization). For the G77A, the Fab-channel complex was passed  
41 through a SEC column pre-equilibrated in a buffer containing 150 mM NaCl. Crystal trials  
42 were performed by the sitting-drop method in 22-26 % PEG400 (v/v), 50 mM magnesium  
43 acetate, 50 mM sodium acetate (pH 4.8.-5.4) at 20 °C. Crystals appeared within a week  
44 period and they were as soon as possible cryo-protected by rising the concentration of

45 PEG-400 to 40% by increasing it 5% per day. A data set were acquired from a single  
46 crystal for the G77A or the G77A mutants at the beamline 14-1, at the Stanford  
47 Synchrotron Radiation Laboratory (SSRL). Image processing and data reduction were  
48 performed with HKL2000(2).

49 Crystal structure determination. The crystal structures of the closed state in high-K<sup>+</sup>  
50 concentration of the KcsA-G77A (PDB=6NFU), high-Na<sup>+</sup> concentration of the KcsA-G77A  
51 (PDB=6PA0) and the KcsA-G77C (PDB=6NFV) were solved by molecular replacement  
52 using the atomic model of the antibody fragment from a Fab-KcsA complex structure at 2  
53 Å resolution (PDB-1K4C)(3) as the search model. The structural models for the these  
54 mutant channels were built using coot(4) and refined with Phenix(5). The protocol for  
55 refining these structures included 2-5 cycles of rigid body, energy minimization, simulated  
56 annealing and individual B-factor refinements. Table 1 contains the statistics of the  
57 crystallographic data analysis. The crystal structural figures used on this paper were  
58 made using Pymol (<https://pymol.org>).

59 Electrophysiological recordings: KcsA-G77A mutant or KcsA wild-type channels were  
60 reconstituted in Asolectin liposomes as described before(6). In Brief, KcsA-WT and G77A  
61 mutant were reconstituted at a 1 to 100 protein-to-lipid ratio (weight/weight), which is a  
62 protein to lipid ratio that allows reliable measurements of macroscopic currents. Asolectin  
63 liposomes (10 mg of dried lipids) were made in the presence of 1 mL of the following  
64 buffer: 200 mM KCl and 5 mM MOPS-buffer at pH 7.0 (reconstitution buffer). The mixture  
65 of KcsA and liposomes were incubated overnight under constant agitation at 4°C with bio-  
66 beads SM-2 from Bio-Rad. Following 24 hours incubation time, proteoliposomes  
67 suspension was spun down by centrifugation at 100,000 g for 2 hours. The pellet of  
68 channel-containing liposomes was resuspended in 60 µL of reconstitution buffer. A drop  
69 of the proteoliposomes suspension containing KcsA-WT or G77A mutant was placed on  
70 a microscope slide and subject to overnight dehydration in a desiccation chamber with  
71 Drierite desiccant. 24 hours later, the drop was rehydrated with 20 µl of reconstitution  
72 buffer at 4°C overnight. Usually, all the samples were ready to patch after a 24 hours  
73 rehydration period, since it yielded giant liposomes suitable for patch-clamp  
74 measurements. Electrophysiology measurements were conducted in symmetrical 5 mM  
75 MOPS at the desired pH in the presence of 200 mM KCl. Macroscopic currents or single  
76 channel recording were recorded from several independent experiments (n=3-5 repeats)  
77 with a patch-clamp amplifier Axopatch 200 B, and currents were sampled at 40 kHz with  
78 an analogue filter set to 10 kHz. Patch pipettes, after fire polishing, displayed a resistance  
79 of 2.0 MΩ (they were filled with 200 mM KCl and 5 mM MOPS-buffer at pH 4.0).

80 Isothermal Titration Calorimetry (ITC). C-terminal truncated KcsA-WT or G77A mutant  
81 were applied to a size exclusion chromatography column ENrich SEC 650 10x300 column  
82 (Bio-Rad) pre-equilibrated with a buffer containing 50 mM Tris-Cl pH 8.0 + 5 mM Dodecyl  
83 Maltoside +150 mM NaCl (Sample buffer). The samples were concentrated to ~380 µM  
84 and they were dialyzed extensively against a buffer with the following buffer composition:  
85 50 mM Tris-Cl pH 8.0, 150 mM NaCl and 5 mM DDM (dialysis buffer). ITC determinations  
86 were conducted in a Nano Isothermal Titration Calorimeter (TA Instruments) at 25 °C.  
87 The protein sample (~380 uM KcsA WT or G77A) was placed in a sample cell that  
88 contains a reaction volume of ~170 µL. The KCl solution used to titrate the dialyzed KcsA  
89 sample were prepared in the dialysis buffer used during the last dialysis step and they

90 were degassed for 30 minutes previous starting the titration experiments using a TA  
91 Instrument degassing instrument (model 63256). 2  $\mu\text{L}$  injections of the KCl solution were  
92 applied into the sample cell (containing the KcsA sample) under constant stirring every  
93 300s. Controls experiments were performed by applying 2  $\mu\text{L}$  injections of the KCl solution  
94 every 300s into the reaction chamber containing only the dialysis buffer. The data  
95 handling and analysis was performed applying a one site independent binding model  
96 contained in the NanoAnalyze software from TA instrument. The total heat changes were  
97 corrected by subtracting the heat signature associated with the dilution of the last  
98 injections. The corrected and normalized heat change was plotted against the molar ratio  
99 of the titrant, as it has been done before(7). The apparent  $K_d$  for  $\text{K}^+$  binding to the KcsA  
100 or the G77A selectivity filters was calculated by fitting the data to a model that considers  
101 one-independent binding site. The binding stoichiometry was set to one ( $N=1$ ) since  
102 according to the canonical model for ion permeation, upon  $\text{K}^+$  depletion, an alternating  
103 ion vacancy at either the S2 or the S3 sites has been proposed based on X-ray  
104 crystallographic analysis(3, 8).

105 Liposomes flux assay to assess KcsA  $\text{K}^+$  selectivity. To assess the ion selectivity of KcsA-  
106 WT and the G77A mutant a fluorescent liposome flux assay that has been used before to  
107 evaluate the function of ion channels was adapted for this purpose (9). C-terminal  
108 truncated KcsA-containing proteoliposomes, 1:100 mass to mass ratio, were preloaded  
109 with 200 mM KCl and then diluted into a buffer containing non-permeant ions such as  $\text{Na}^+$   
110 or  $\text{NMG}^+$ . In these conditions, the large  $\text{K}^+$  concentration difference between the inside  
111 and the outside of the proteoliposomes promote the selective exit of  $\text{K}^+$  ions through KcsA  
112 if the channel is open (the C-terminal truncated version of KcsA displays a higher channel  
113 activity at neutral pH), which in turn produces a membrane electrical potential (negative  
114 inside the proteoliposomes). Upon addition of 1  $\mu\text{M}$  of the membrane permeable pH-  
115 sensitive ACMA dye and 1  $\mu\text{M}$  of the protonophore CCCP, a clear time dependent  
116 reduction of fluorescence intensity emitted at 480 nm is recorded, as a consequence of  
117 ACMA quenching by protons (i.e., protons will enter via CCCP only if KcsA is active and  
118  $\text{K}^+$  selective). When the KcsA-containing liposomes (WT or G77A) are diluted in a buffer  
119 containing permeant ions, no membrane potential is generated and consequently no  
120 quenching of the ACMA fluorescence is detected. The assay is finished by the addition  
121 of 1  $\mu\text{M}$  valinomycin, which empty the remaining vesicles and produce the maximum  
122 quenching of the fluorescent signal.

123

124

125

126 **Table S1.**

127

| Statistic                        | G77A<br>(PDB=6NFU) **  | G77A in Sodium           | G77C<br>(PDB=6NFV) ** |
|----------------------------------|------------------------|--------------------------|-----------------------|
| <b>Space Group</b>               | I 4                    |                          | I 4                   |
| Cell Dimension                   |                        |                          |                       |
| <i>a=b, c</i> (Å)                | 155.08, 75.79          | 155.01, 76.10            | 156.15, 76.11         |
| $\alpha=\beta=\gamma$ (°)        | 90                     | 90                       | 90                    |
| Resolution (Å)                   | 31.18-2.09 (2.16-2.09) | 34.66-2.05 (2.12-2.05)   | 34.9-2.13 (2.20-2.13) |
| <i>R</i> <sub>merge</sub>        | 0.075 (0.49)           | 0.099 (0.85)             | 0.1 (0.7)             |
| <i>I</i> / $\sigma$ <i>I</i>     | 30.38 (5.0)            | 15.76 (0.88) [C1/2=0.54] | 33.74 (1.6)           |
| Completeness (%)                 | 99.89 (99.89)          | 97.55 (83.94)            | 99.29 (99.54)         |
| Redundancy                       | 7.9 (8.2)              | 5.2 (3.5)                | 3.3 (2.8)             |
| <b>Refinement</b>                |                        |                          |                       |
| No. reflections                  | 53355 (5319)           | 55579 (4870)             | 51020 (4913)          |
| <i>R</i> <sub>work</sub>         | 0.21 (0.25)            | 0.1981 (0.33)            | 0.205 (0.288)         |
| <i>R</i> <sub>free</sub>         | 0.22 (0.30)            | 0.2350 (0.38)            | 0.242 (0.315)         |
| No. atoms                        | 4356                   | 4277                     | 4165                  |
| Protein                          | 4006                   | 4006                     | 4016                  |
| Ligand/ion                       | 4                      | 1                        | 4                     |
| Waters                           | 305                    | 229                      | 104                   |
| Other ligands                    | 45                     | 42                       | 45                    |
| Protein residues                 | 534                    | 534                      | 534                   |
| Bond lengths (Å)                 | 0.004                  | 0.008                    | 0.009                 |
| Bond angles (°)                  | 0.99                   | 1.18                     | 1.25                  |
| Wilson B-factor                  | 35.46                  | 42.76                    | 50.54                 |
| Average B-Factor, Å <sup>2</sup> | 43.40                  | 49.87                    | 60.29                 |
| Protein                          | 42.87                  | 49.55                    | 60.26                 |
| Ligands                          | 56.15                  | 61.6                     | 71.49                 |
| Water                            | 48.52                  | 53.28                    | 56.68                 |
| Ramachandran Favored (%)         | 97.35                  | 97.92                    | 97.54                 |
| Ramachandran outliers (%)        | 0.00                   | 0.00                     | 0.00                  |

128 \*Highest resolution shell is show in parenthesis.

129 \*\* Data sets were collected from a single crystal.

130

131

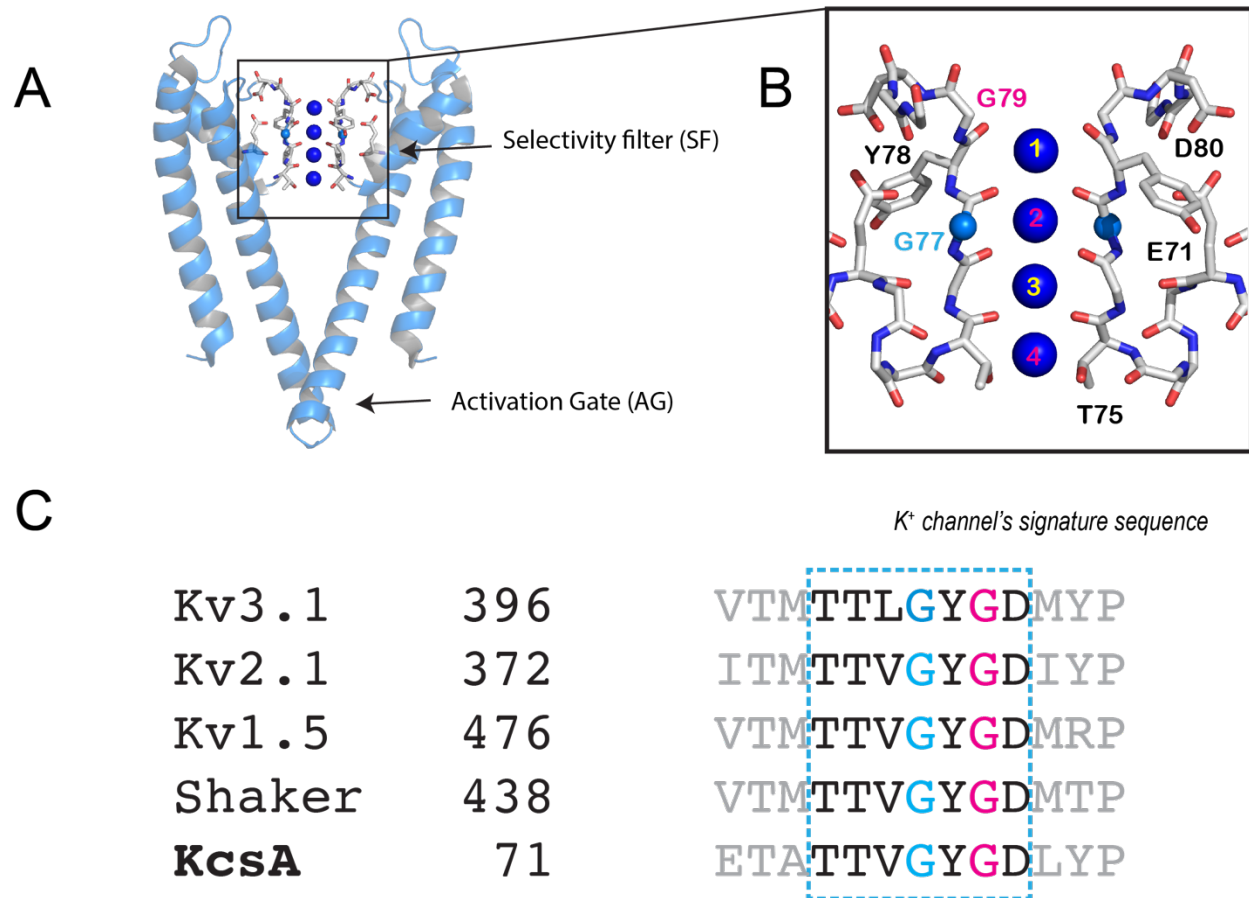

132 **Fig. S1. The signature sequence of a K<sup>+</sup> channel.** (A) A cartoon representation of KcsA  
 133 in blue, only two subunits are shown for clarity, highlighting the position of the channel's  
 134 selectivity filter coordinating four (4) K<sup>+</sup> ions. (B) An inset showing a magnification of the  
 135 channel's selectivity filter, underlining the position of the backbone carbonyl groups from  
 136 two subunits relative to the four coordinated K<sup>+</sup> ions. Amino acid residues E71, G79, G77  
 137 and T75 are determinant key players for the function of the channel. (C) A sequence  
 138 alignment of 5 representative members of the K<sup>+</sup> channels super family indicating the  
 139 position of the so called "*K<sup>+</sup> channel's signature sequence*". In blue and red are  
 140 underscored the two highly conserved glycine residues (G77 and G79) within this stretch  
 141 of amino acid residues. A perturbation analysis by mutagenesis of the Glycine 77 is the  
 142 subject of this study.

143

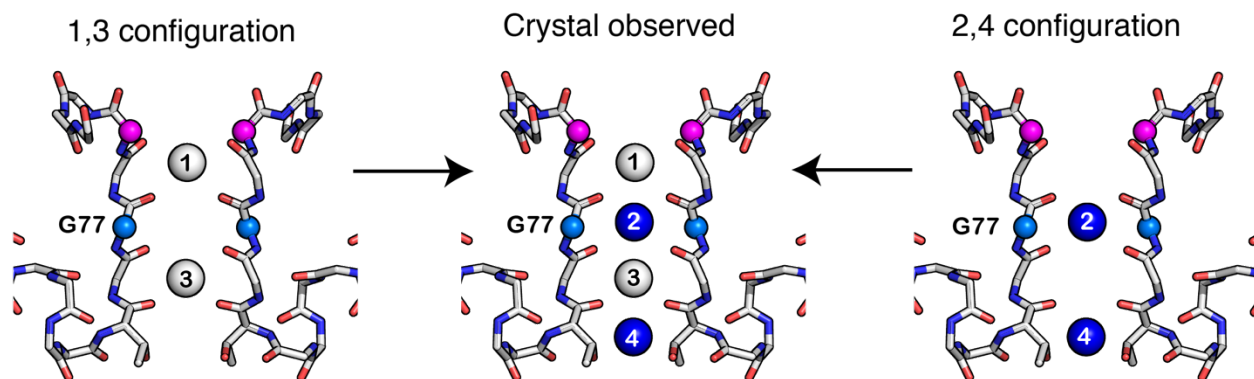

144  
 145 **Fig. S2. Two-alternating K<sup>+</sup> ion bound configurations coexist in equilibrium within**  
 146 **a K<sup>+</sup> channel selectivity filter.** The 4 K<sup>+</sup> ions seen in the selectivity filter of all the crystal  
 147 structures of K<sup>+</sup> channels solved to date (crystal observed, central panel) presumably  
 148 corresponds to the superposition of two iso-energetic K<sup>+</sup> ion bound configurations. The  
 149 1,3 (left panel) and 2,4 (right panel) ion bound configurations are likely to have the same  
 150 probability to exist in solution, hence within the crystal lattice, the superposition of these  
 151 two alternating K<sup>+</sup> ions-water molecules configurations yields a structure that displays four  
 152 bound K<sup>+</sup> ions.

153  
 154  
 155

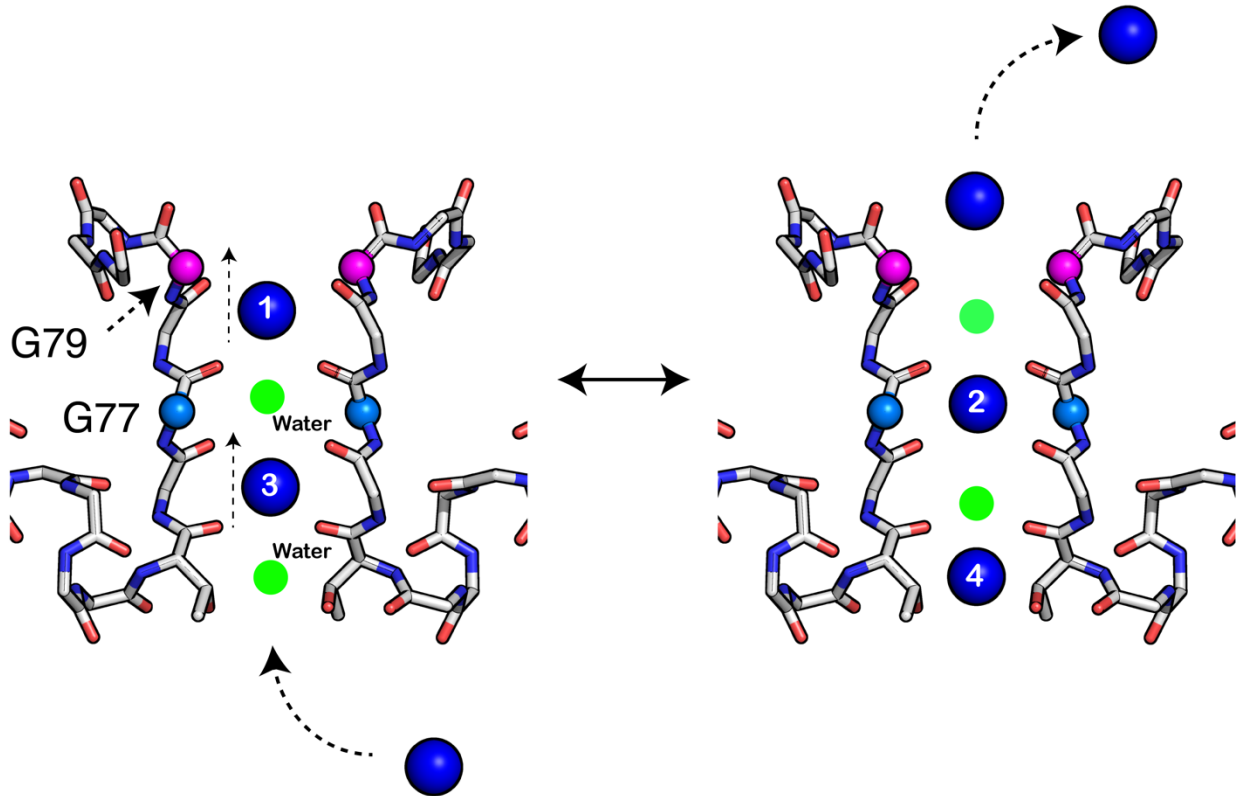

156  
 157  
 158  
 159  
 160  
 161  
 162  
 163  
 164  
 165

**Fig. S3. Model for ion permeation according to the “canonical model”.** The panel on the left displays a K<sup>+</sup> channel selectivity filter with two K<sup>+</sup> ions, which are bound to the S1 and the S3 sites. In between these two bound K<sup>+</sup> ions, this model proposes the existence of a water molecule, which has never been seen in crystal structures. When a K<sup>+</sup> ion moves from the intracellular milieu and occupies the S4 site, strong electrostatic repulsion drives the ion bound at the S3 site to diffuse or to permeate to the S2 site. During every cycle of transport one water molecule is transported per each K<sup>+</sup> ion.

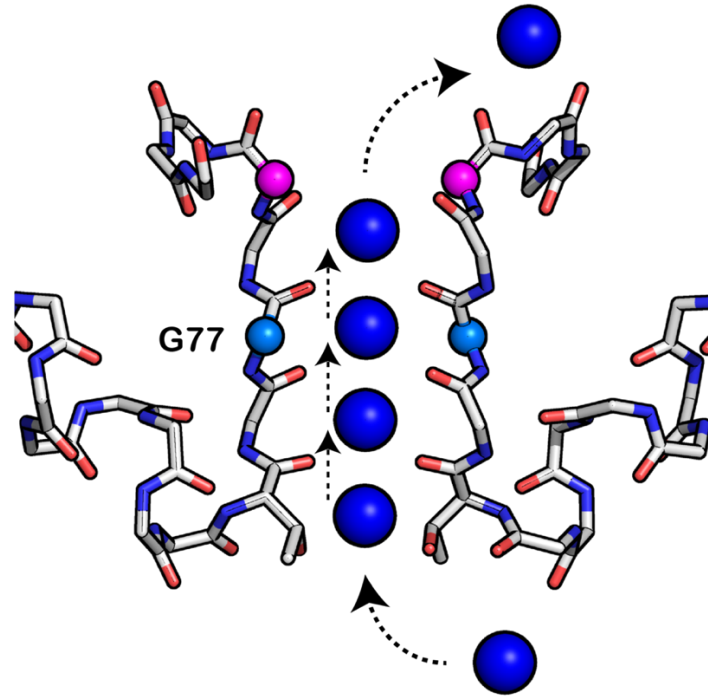

166  
 167  
 168  
 169  
 170  
 171  
 172  
 173  
 174  
 175  
 176

**Fig. S4. An alternative model for ion permeation in  $K^+$  channels, known as the hard-knock-on mechanism or direct Coulomb knock-on.** The hard-knock-on mechanism assumes the maximum occupancy, at steady state conditions, of the  $K^+$  ions bound to a  $K^+$  channel selectivity filter. This means that at any given moment there are 4  $K^+$  ions coordinated in the filter and that not water molecules move per transport cycle. The  $K^+$  ions interact directly exerting a very strong electrostatic repulsion, which drives the high-permeation rates characteristic of  $K^+$  channels.



A

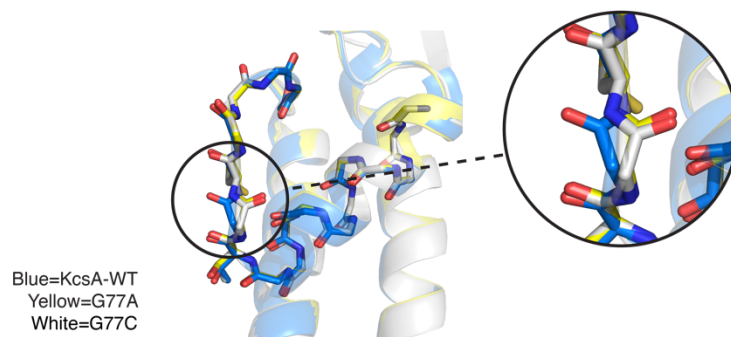

B

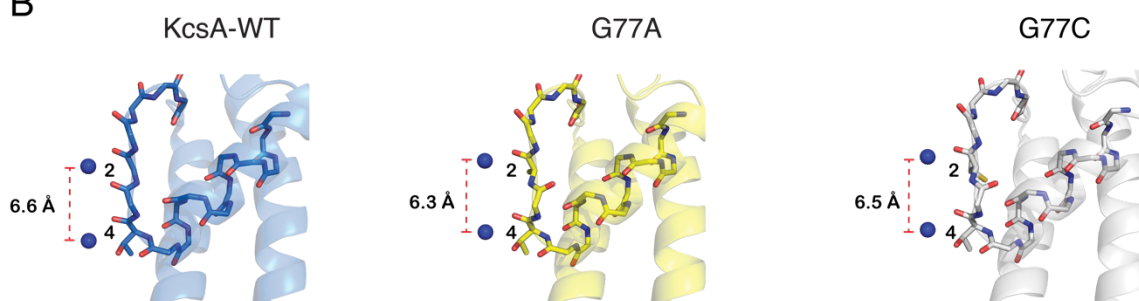

177  
178  
179  
180  
181  
182  
183  
184  
185  
186  
187

**Fig. S5. A structural alignment of the selectivity filters of the KcsA-WT and the G77A and G77C mutants.** (A) A structural alignment of the KcsA-WT (light-blue) and G77A (yellow) or G77C (white) selectivity filter mutants indicates that they have a very similar structure, r.m.s.d=0.20 and 0.32 Å for the selectivity filter atoms, respectively. The inset zoom into the main structural difference between the three selectivity filter structures, the back-flipping of the Val76 carbonyl group, which no longer coordinate a K<sup>+</sup> ion at the S3 site. (B) The panel highlights the interatomic distance differences between the K<sup>+</sup> ions bound to the S2 and the S4 sites of the selectivity filter of the KcsA-WT (blue), G77A (Yellow) and G77C (white).

### References:

188  
189  
190  
191  
192  
193  
194  
195  
196  
197  
198  
199  
200  
201

1. Tilegenova C, Vemulapally S, Cortes DM, & Cuello LG (2016) An improved method for the cost-effective expression and purification of large quantities of KcsA. *Protein Expr Purif* 127:53-60.
2. Otwinowski Z & Minor W (1997) Processing of X-ray diffraction data collected in oscillation mode. *Methods Enzymol* 276:307-326.
3. Zhou M, Morais-Cabral JH, Mann S, & MacKinnon R (2001) Potassium channel receptor site for the inactivation gate and quaternary amine inhibitors. *Nature* 411(6838):657-661.
4. Emsley P & Cowtan K (2004) Coot: model-building tools for molecular graphics. *Acta Crystallogr D Biol Crystallogr* 60(Pt 12 Pt 1):2126-2132.
5. Adams PD, *et al.* (2010) PHENIX: a comprehensive Python-based system for macromolecular structure solution. *Acta Crystallogr D Biol Crystallogr* 66(Pt 2):213-221.

- 202 6. Cortes DM, Cuello LG, & Perozo E (2001) Molecular architecture of full-length KcsA: role  
203 of cytoplasmic domains in ion permeation and activation gating. *J Gen Physiol* 117(2):165-  
204 180.
- 205 7. Hariharan P & Guan L (2017) Thermodynamic cooperativity of cosubstrate binding and  
206 cation selectivity of *Salmonella typhimurium* MelB. *J Gen Physiol* 149(11):1029-1039.
- 207 8. Zhou Y & MacKinnon R (2003) The occupancy of ions in the K<sup>+</sup> selectivity filter: charge  
208 balance and coupling of ion binding to a protein conformational change underlie high  
209 conduction rates. *J Mol Biol* 333(5):965-975.
- 210 9. Whicher JR & MacKinnon R (2016) Structure of the voltage-gated K(+) channel Eag1  
211 reveals an alternative voltage sensing mechanism. *Science (New York, N.Y)* 353(6300):664-  
212 669.  
213
